# Supplementary material for: Arsinothricin, an arsenic-containing non-proteinogenic amino acid analog of glutamate, is a broad-spectrum antibiotic
Source: PubMed Central journal article supplement (PMC6465285; doi:10.1038/s42003-019-0365-y), 2019-04-15
Supplement: 42003_2019_365_MOESM1_ESM.pdf [file 42003_2019_365_MOESM1_ESM.pdf]

Supplementary Figure 1.

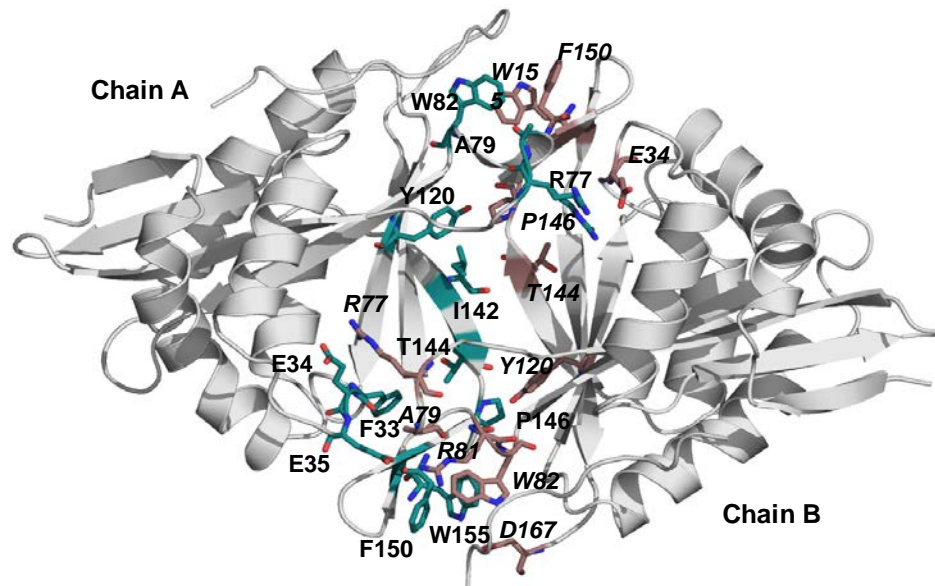

**Crystallographic analysis of the PpArsN1 dimer.** The crystallographic asymmetric unit with Chains A and B is shown. The interfacial residues are shown in stick representation. Chain A residues are colored in teal, and Chain B residues are shown in brown and are labeled in italics.

**Supplementary Figure 2.**

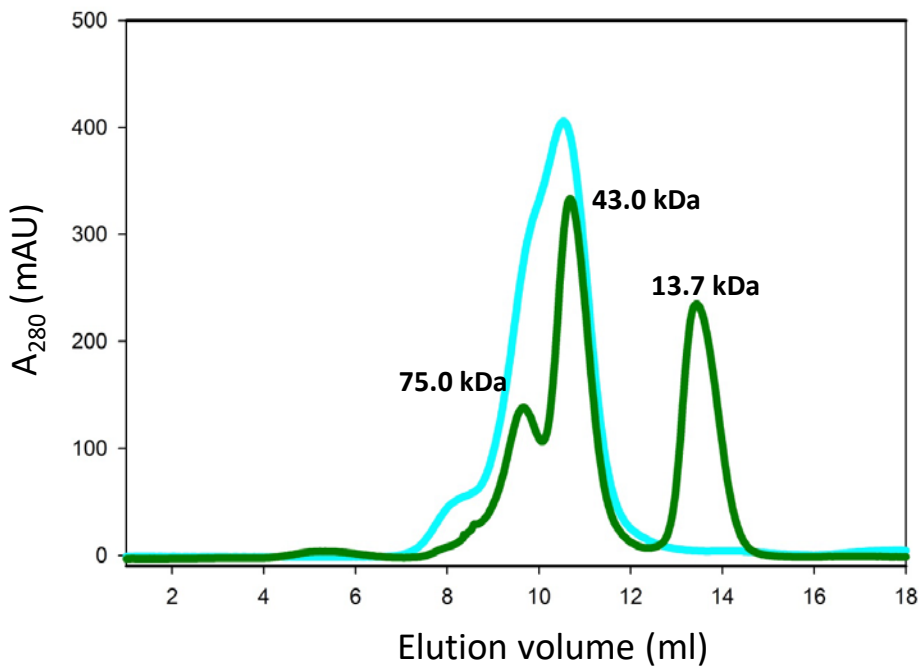

**PpArsN1 is a dimer in solution.** The oligomerization state of purified protein was analyzed by gel filtration. Purified PpArsN1 was chromatographed through Superdex75 in a 10/300 GL column. Elution of PpArsN1 is shown in cyan, and a mixture of proteins of known molecular mass is shown in green.

### Supplementary Figure 3.

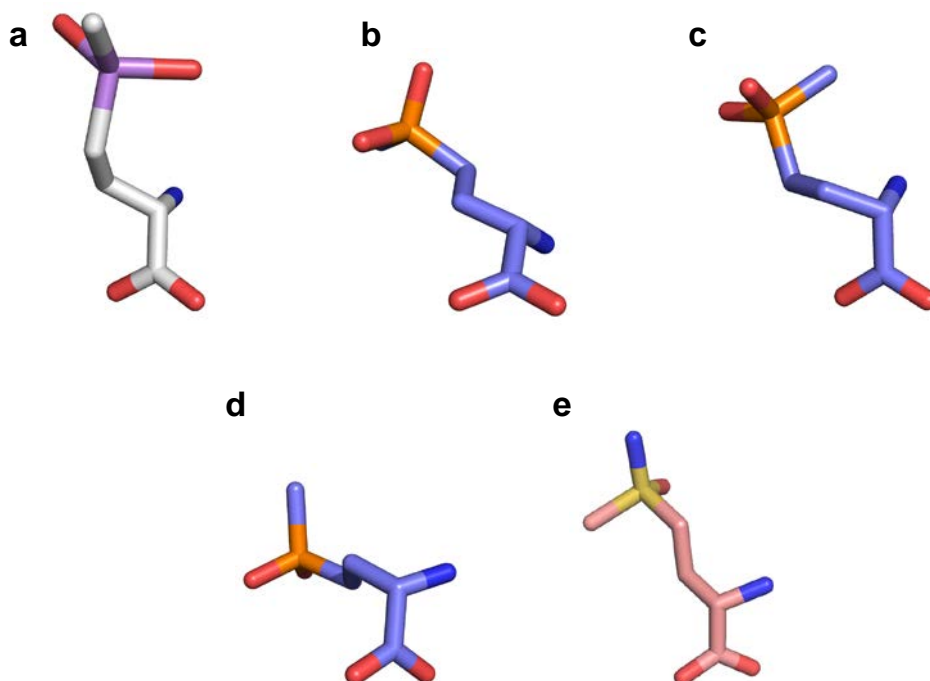

**The L-enantiomer of AST is bound to PpArsN.** Comparison of ArsN1-bound AST (**a**), PPT-1 (**b**) and PPT-2 (**c**) with ShPAT-bound L-PPT (PDB ID: 5T7E) (**d**) and PaMAT-bound L-MSO (PDB ID: 2J8R) (**e**) confirms that PpArsN1-bound AST is the L-enantiomer. PaMAT: Methionine sulfoximine *N*-acetyltransferase from *Pseudomonas aeruginosa* PAO1 (GenBank accession number: AAG08251).

#### Supplementary Figure 4.

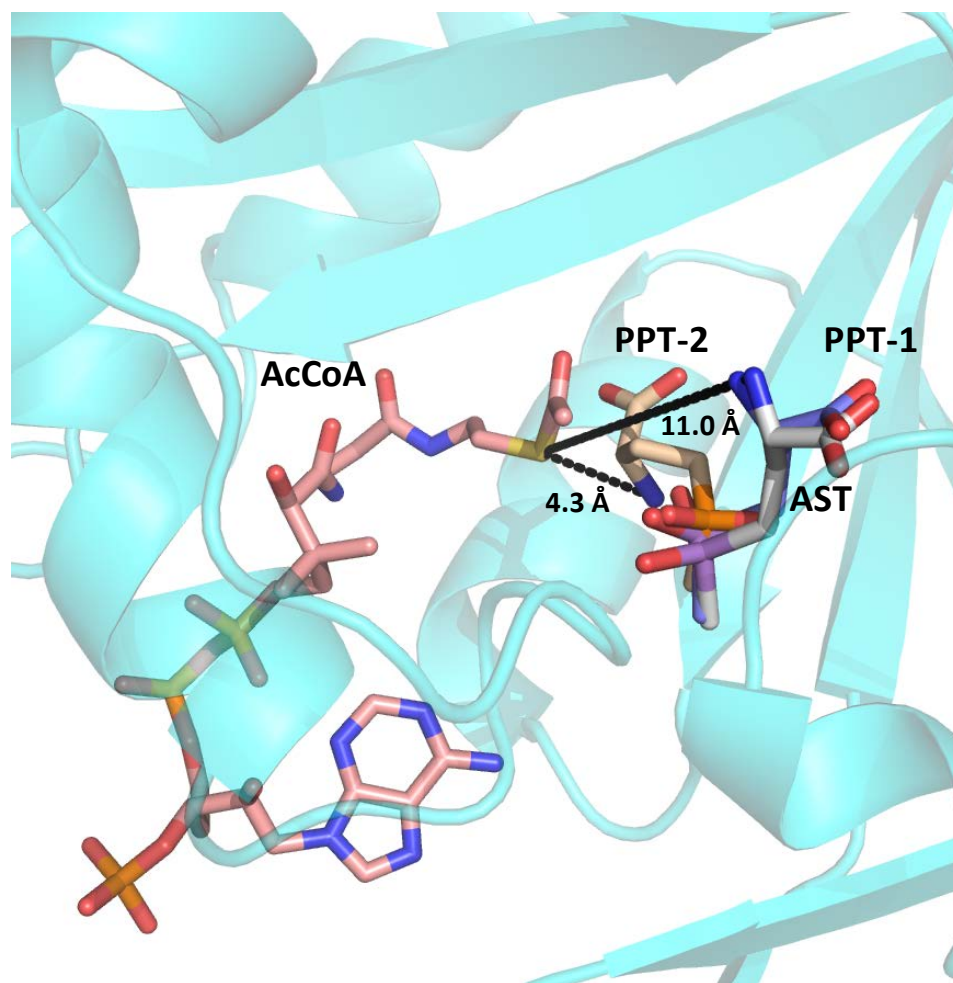

**Model of AcCoA- and substrate-bound PpArsN1.** The AcCoA binding site was predicted by docking AcCoA with the structure of PpArsN1 using Autodock4. The distance between the amino group of AST and that of PPT-1 and the sulfur atom of AcCoA is approximately 11.0 Å, which is too far for N-acetylation. The distance between the amino group of PPT-2 and the sulfur atom of AcCoA is 4.3 Å, which is within the possible distance for N-acetylation. We propose that the substrates move into position for N-acetylation by conformational changes during the catalytic cycle.

**Supplementary Figure 5.**

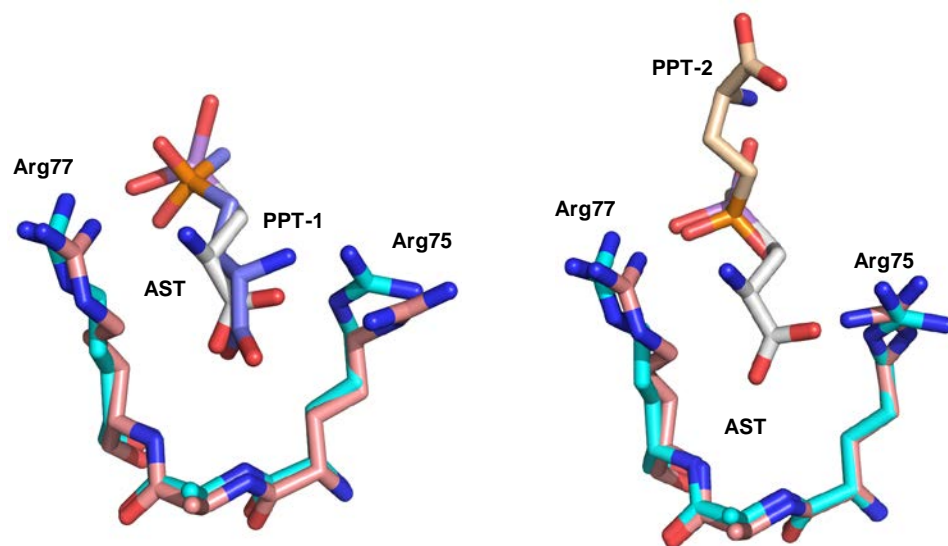

**Superposition of residues Arg77 and Arg75 of AST and PPT bound PpArsN1 structures.**

A portion of the AST binding site in PpArsN1-AST (cyan) is superimposed with that of the PpArsN1-PPT structures (salmon). Left and right cartoons depict Chain A and Chain B, respectively.

Supplementary Figure 6.

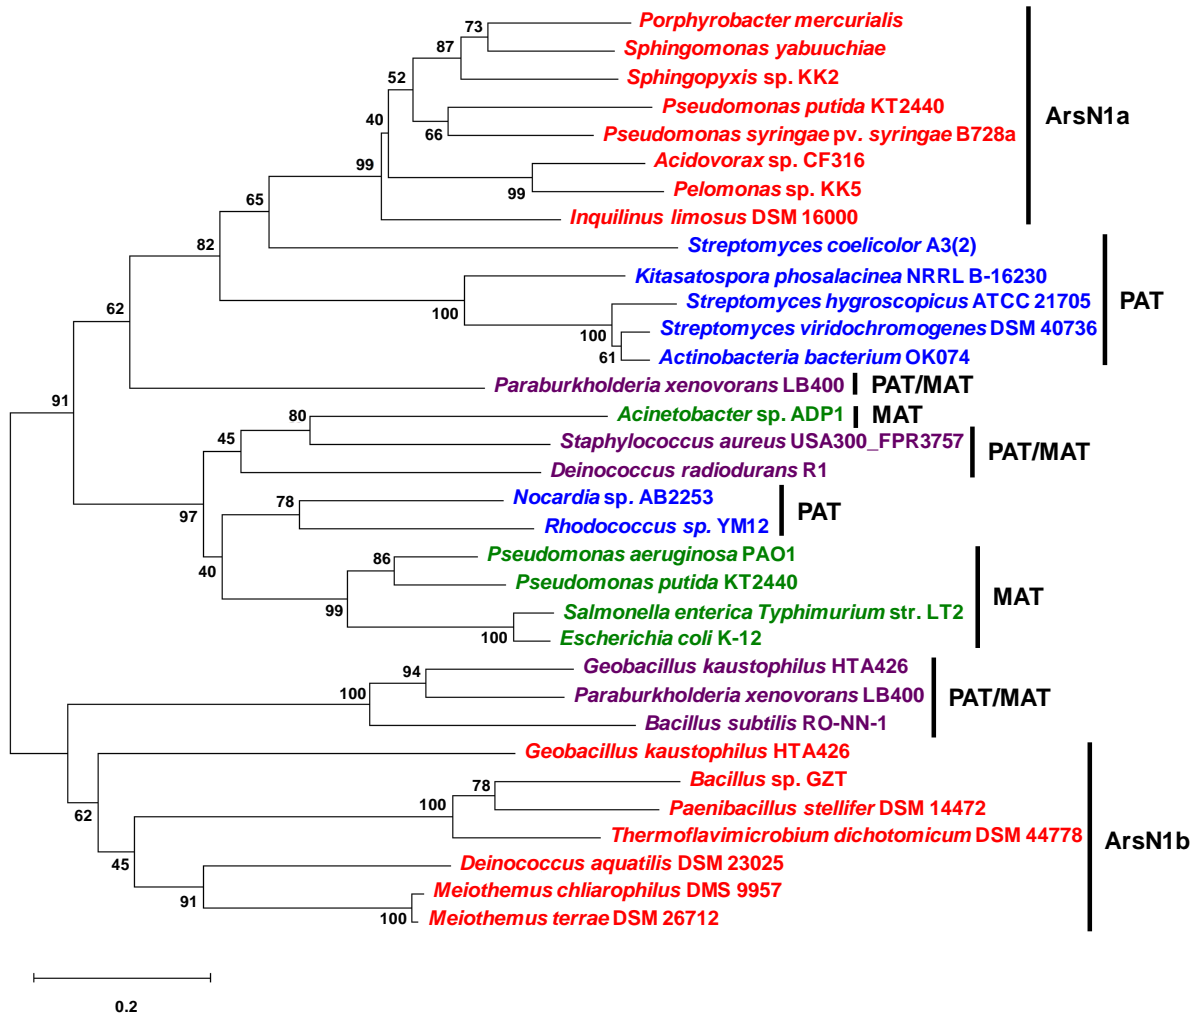

**Phylogeny of *N*-acetyltransferase genes for resistance to AST, PPT and MSO.** The neighbor-joining phylogenetic tree shows the evolutionary relationships of ArsN1, PAT and MAT. ArsN1 (highlighted in red), PAT (blue) and MAT (green) are defined as described in *Methods*. *N*-acetyltransferases that have similar activity with both PPT and MSO are labeled as PAT/MAT (purple). ArsN1 genes are further sorted into two clades (ArsN1a and ArsN1b). Bootstrap values calculated for 1,000 subsets (%) are indicated on each branch. GenBank accession numbers of bacterial genomes are given in *Methods*. The scale bar represents 20% sequence dissimilarity.

Supplementary Figure 7.

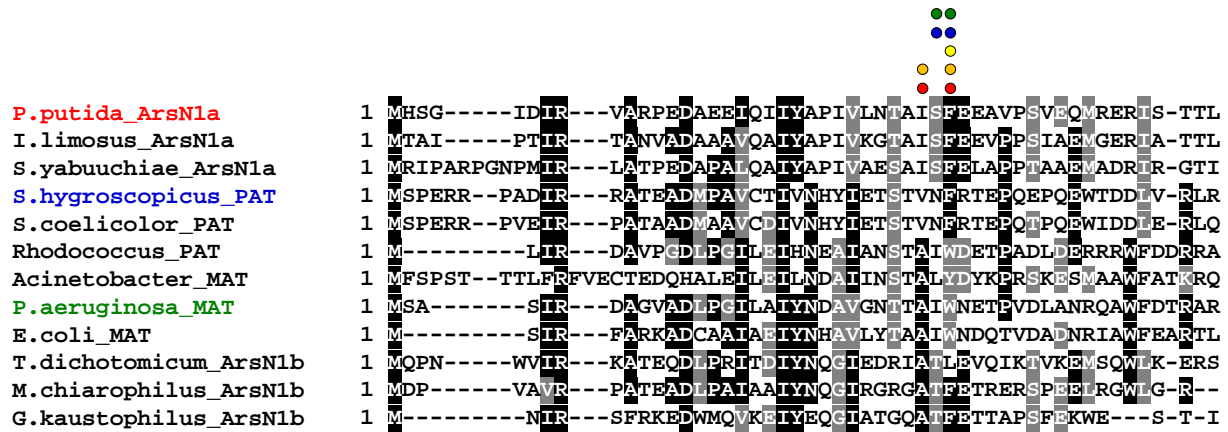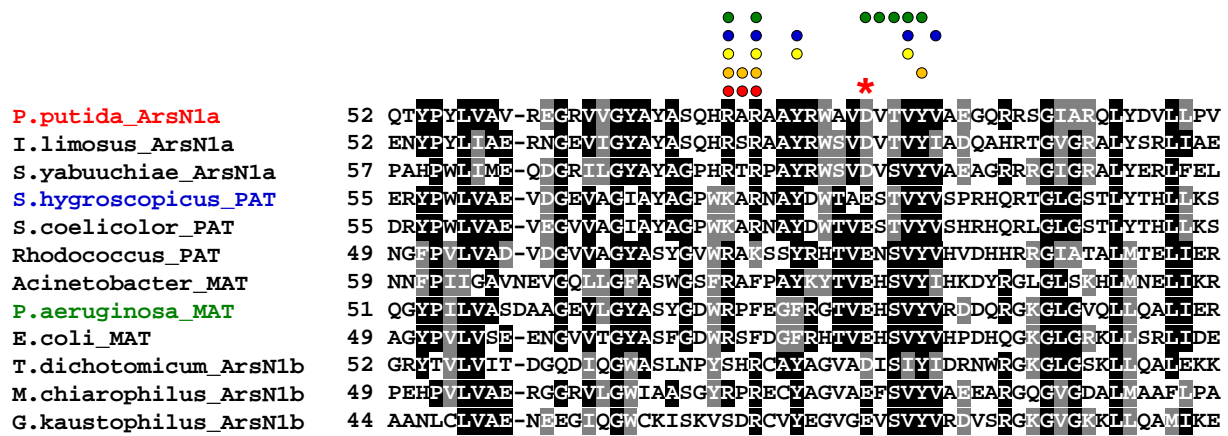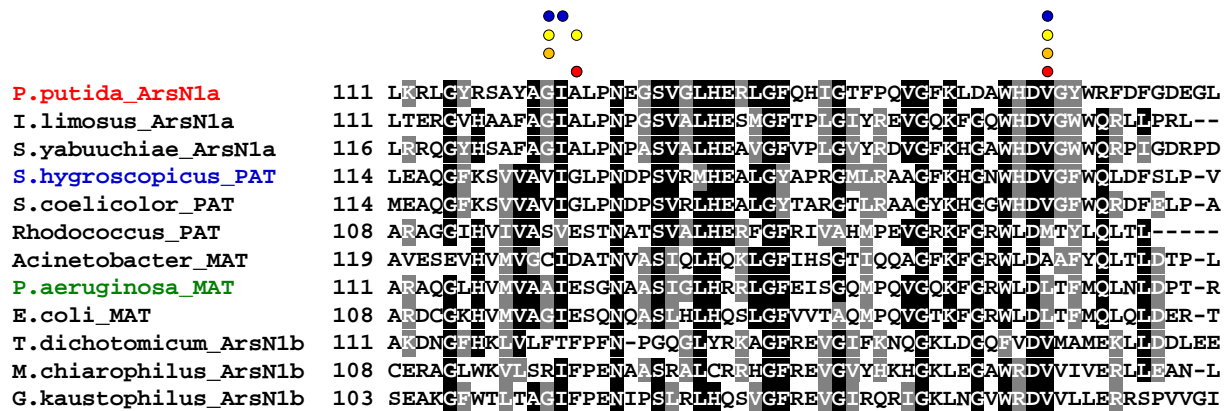

Multiple protein sequence alignment of *N*-acetyltransferase orthologs of ArsN1, PAT and MAT. Circles of red, orange and yellow indicate the substrate-binding residues for AST, PPT-1 and PPT-2, respectively, in *P. putida* ArsN1 (red letters). Circles of blue and green indicate the

PPT-binding residues in *S. hygrosopicus* PAT (blue letters) and *P. aeruginosa* MAT (green letters), respectively. Asp85 in PpArsN1 is replaced by Glu residue in both PPT N-acetyltransferase. The position of the conserved catalytic residue Glu88 in ShPAT that acts as a general base is highlighted by a red asterisk. C-terminal sequences that are poorly conserved are not shown.



### Supplementary Figure 8.

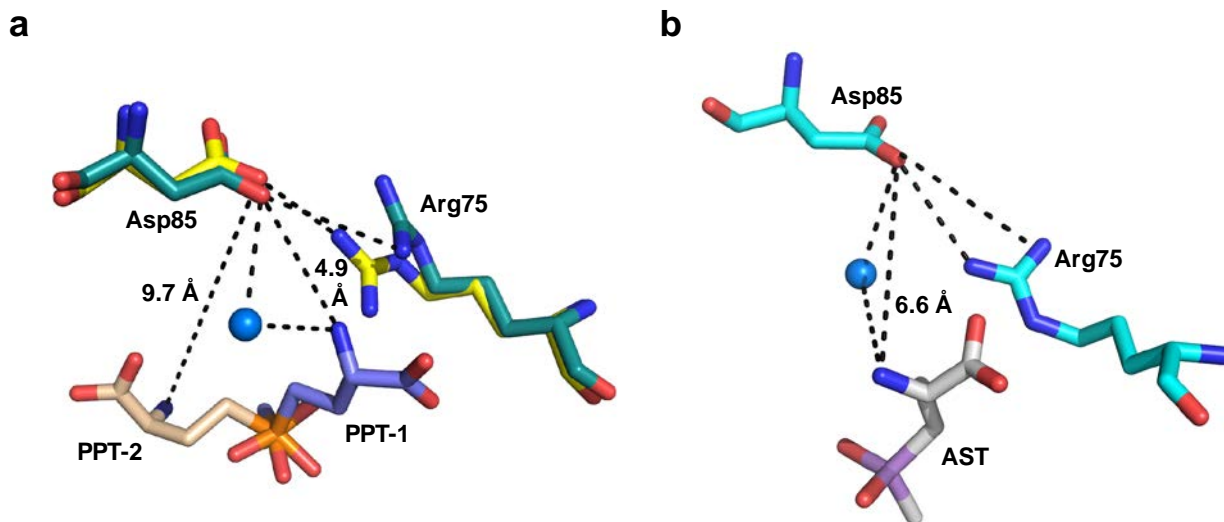

**Interaction of PPT (a) and AST (b) with Asp85 via a water molecule. (a)** The distance between the amino group of L-PPT and the side chain of Asp85, a predicted catalytic residue, is 4.9 Å and 9.7 Å in the PPT-1 and PPT-2 conformations, respectively. The amino group of L-PPT interacts Asp85 through water molecule in the PPT-1 conformation but not in the PPT-2 conformation. Residues from PpArsN1 in the PPT-1 and PPT-2 conformations are shown in yellow and teal blue, respectively. **(b)** The distance between the amino group of L-AST and the side chain of Asp85 is 6.6 Å. As seen in the PPT-1 conformation, the amino group of L-AST form a water molecule interaction with the side chain of Asp85. Water molecules are in blue spheres.

**Supplementary Figure 9.**

**a**

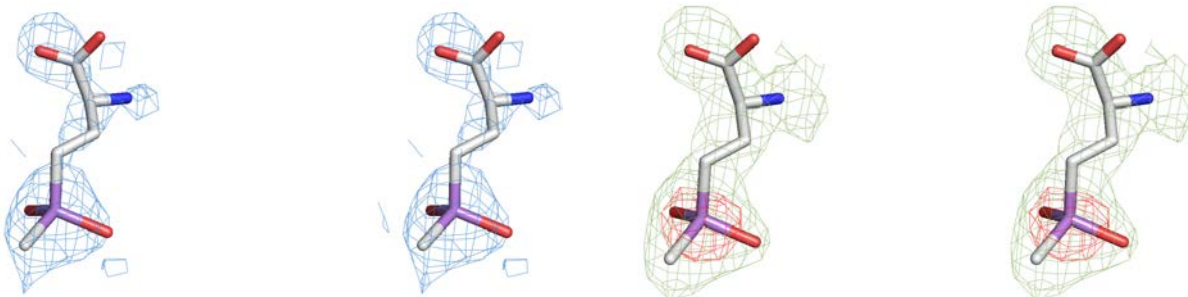

**b**

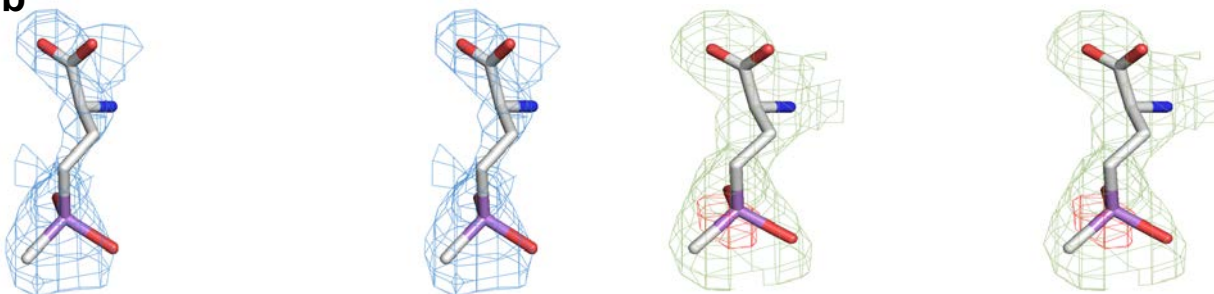

**Stereo view of the electron density of AST in the PpArsN1 structure. a.** AST in chain A. **b.** AST in chain B. Electron density (2Fo-Fc) map for AST contoured at the 1.0  $\sigma$  level (blue) omit map (Fo-Fc) at 2.0  $\sigma$  (green) and anomalous difference map at the 3.0  $\sigma$  level (red) of AST.

**Supplementary Figure 10.**

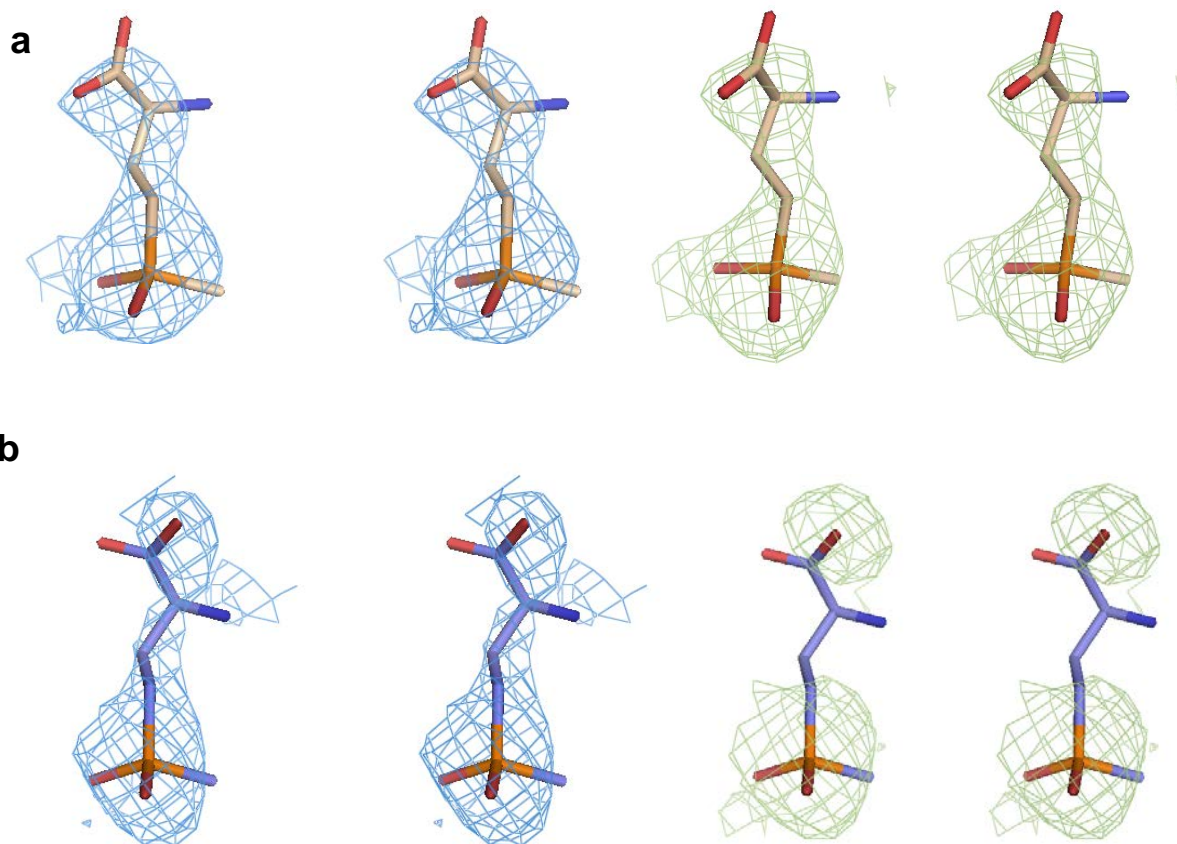

**Stereo view of electron density of PT in the PpArsN1 structure. a.** PPT-2 (conformation 2).

**b.** PPT-1 (conformation 1). Electron density (2Fo-Fc) map for PPT contoured at the 1.0  $\sigma$  level (blue); Omit map (Fo-Fc) at 2.0  $\sigma$  level of PPT (green).
